# Supplementary material
Source: PubMed Central journal article supplement (PMC7030873)
Supplement: jciinsight-5-127657-s123.pdf [file jciinsight-5-127657-s123.pdf]

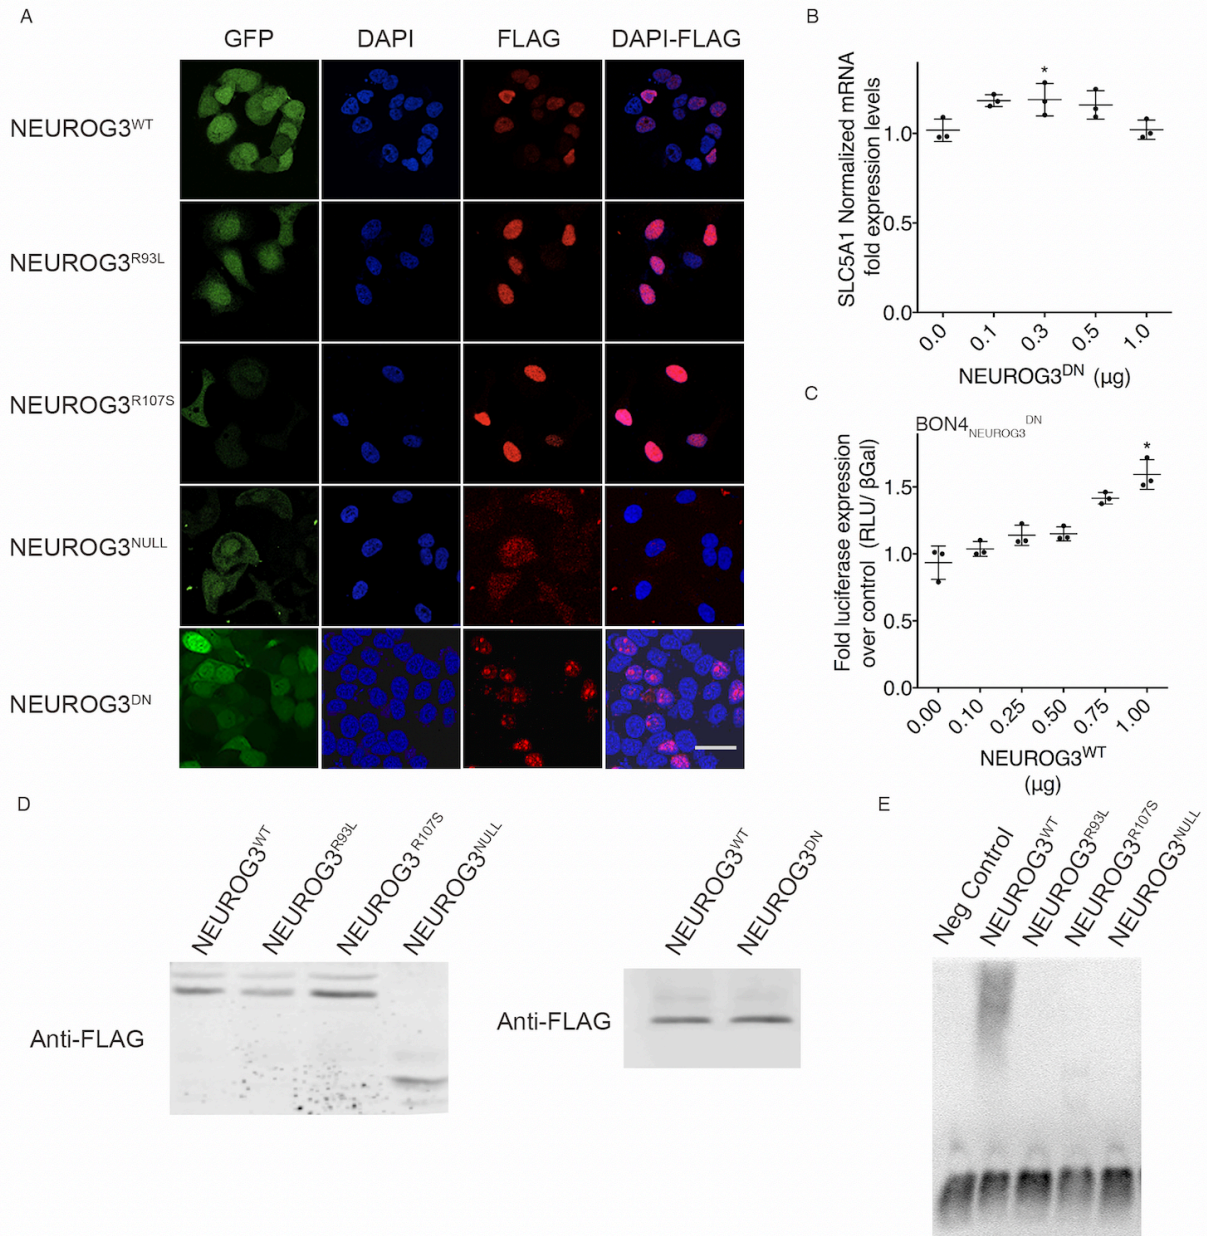

**Supplement Figure 1: (A)** BON4 cells transduced with various NEUROG3-expressing constructs with coexpressing GFP and stained with anti-FLAG antibody and DAPI. (Line - 25  $\mu$ m) **(B)** BON4 cells transfected with SLC5A1 promoter reporter and increasing concentration of NEUROG3 expression vector. **(C)** Western blot with anti-FLAG of BON4 cells expressing various NEUROG3 variants. **(D)** Gel shift assay was performed using nuclear extracts of BON4 cells expressing NEUROG3<sup>WT</sup>, NEUROG3<sup>R93L</sup>, NEUROG3<sup>R107S</sup> and NEUROG3<sup>NULL</sup>, and a biotin labeled duplex oligonucleotide, NEUROD1 E-box1. **(E)** BON4 NEUROG3<sup>DN</sup> cells cotransfected with increasing concentrations of NEUROG3<sup>WT</sup> and the NEUROD-1 E-box1 reporter.

### Supplement Table 1:

| PMID#    | Mutation                | Sex | Outcome      | Age reported | Diarrhea - age of onset | IDDM - age of onset                     | C-peptide detected | In vitro test | NEUROD1 promoter; EMSA | Animal  |
|----------|-------------------------|-----|--------------|--------------|-------------------------|-----------------------------------------|--------------------|---------------|------------------------|---------|
| 16855267 | p.R107S                 | M   | Died; (MVTx) | 3 yr         | < 1 week                | No                                      | No                 | Yes           | HeLa; Yes; Yes         | Xenopus |
| 16855267 | p.R93L                  | M   | Alive        | 8 yr         | < 1 week                | 8 yr                                    | No                 | Yes           | HeLa; Yes; Yes         | Xenopus |
| 16855267 | p.R93L                  | M   | Alive        | 9 yr         | < 1 week                | 8 yr                                    | No                 | Yes           | HeLa; Yes; Yes         | Xenopus |
| 21378176 | p.E28X   p.L135L        | F   | alive        | 7 yr         | < 1 week                | 20 days                                 | Yes                | Yes           | P19; Yes               | Chick   |
| 27533310 | p.L135P                 | F   | Alive        | 24 yr        | congenital              | 6 yr*                                   | Yes                | No            | /                      | /       |
| 27533310 | p.L135P                 | M   | Alive        | 17 yr        | congenital              | 13 yr                                   | Yes                | No            | /                      | /       |
| 27533310 | p.R107S                 | F   | Alive        | 18 yr        | congenital              | 14 yr                                   | Yes                | No            | /                      | /       |
| 27533310 | p.R107S                 | M   | Alive        | 23 yr        | congenital              | No                                      | Yes                | No            | /                      | /       |
| 24134759 | p.171FsX68              | F   | Alive        | 20 mo        | < 10 days               | No                                      | ND                 | No            | /                      | /       |
| 21490072 | p.E123X                 | F   | Died; sepsis | 10 mo        | < 1 week                | 5.5 mo                                  | Yes                | Yes           | 293T; Yes              | No      |
| 28940958 | p.Q4X                   | M   | Alive        | 5 yr         | < 1 week                | 2 mo; insulin d/c 13 days; intermittent | Yes                | No            | /                      | /       |
| 28940958 | p.Q4X                   | F   | Alive        | 7 yr         | < 2 week                |                                         | Yes                | No            | /                      | /       |
| 26541772 | p.R93L                  | M   | Alive        | 2.5 yr       | < 2 week                | No                                      | Yes                | No            |                        |         |
| 28724572 | p.R107S                 | M   |              | 16 yr        | < 2 week                | 11 yr                                   | ND                 | No            | /                      | /       |
| Current  | p.P39PfsX38 p.H145Pfs*9 | M   | Alive        | 16 yr        | 2 week                  | 3 yr                                    | Yes                | Yes           | BON4; Yes; Yes         | No      |
| Current  | 4                       | F   | Alive        | 14 yr        | 2 week                  | 7 yr                                    | Yes                | Yes           | BON4; Yes; Yes         | No      |

### Supplement Table 2: Oligonucleotides (vectors)

| Cloning/EMSA Oligo names         | Oligo sequences                                          |
|----------------------------------|----------------------------------------------------------|
| NEUROG3 BamH1 5'                 | ACGGATCCATGACGCCTCAACCCTCGGGTG                           |
| NEUROG3-FLAG EcoR1 3'            | ATGAATTCTCACTTGTTCATCGTCGTCCTTGTAGTCCAGAAAATCTGAGAAAGCCA |
| NEUROG3-H144PfsX94-FLAG EcoR1 3' | ATGAATTCTCACTTGTTCATCGTCGATCCTTGTAGTCCGGCTCCCGGCTC       |
| p21 promoter (-592/14) Kpn1 5'   | CGGGTACCTCAAGATGCTTTGTTGGGGTG                            |
| p21 promoter (-592/14) BglII 3'  | CGAGATCTGCCAGCTCCGGCTCCACAAGGA                           |

**Supplement Table 3: Oligonucleotides (EMSA, qPCR)**

| Gene               | 5' Oligo             | 3' Oligo             | qPCR Method |
|--------------------|----------------------|----------------------|-------------|
| NEUROG3            | CCTCGGAAGACGAAGTGACC | AGTGCCAACTCGCTCTTAGG | Sybr Green  |
| NEUROG3-H144PfsX94 | CGCAATCGAATGCACAACCT | CTATGCGCAGCGTTTGAGTC | Sybr Green  |
| CHGA               | CGGATCCTTTCCATTCTGAG | TCATCTTCAAACCGCTGTG  | Sybr Green  |
| PCSK1              | TGGTTTGGAGTGGAATCACA | GTCCCGTGTTTGTCTCGTT  | Sybr Green  |
| Tubulin            | GCTGCGGACCGAGAAACT   | CTTGGCCCCGATCTGGTTG  | Sybr Green  |

**Supplement Table 4: Antibodies**

| Antibody            | Species | Vendor                   | Isotype    | Dilution | Mass      | Cat. No.      |
|---------------------|---------|--------------------------|------------|----------|-----------|---------------|
| FLAG                | Human   | Sigma Aldrich            | Mouse IgG1 | 1/1000   |           | F3165         |
| NEUROG3             | Human   | DSHB                     | Mouse IgG  | 1/1000   | 23 kDa    | F25A1B3       |
| CHGA                | Human   | Santa Cruz Biotechnology | Goat IgG   | 1/1000   | 68-80 kDa | SC-1488       |
| PCSK1               | Human   | ABNOVA                   | Mouse IgG  | 1/1000   | 70 kDa    | H00005122-M02 |
| TUBULIN             | Human   | DSHB                     | Mouse IgG  | 1/1000   | 55 kDa    | AA4.3         |
| Anti-rabbit IgG-HRP | Rabbit  | GE Healthcare            | IgG-HRP    | 1/2000   |           | NA9340V       |
| Anti-mouse IgG-HRP  | Mouse   | GE Healthcare            | IgG-HRP    | 1/2000   |           | NA9310V       |
| Anti-goat IgG-HRP   | Goat    | Santa Cruz Biotechnology | IgG-HRP    | 1/2000   |           | SC-2020       |
| Ki67                | Human   | Leica Biosystems         | Mouse IgG1 | 1/50     | 345 kDa   | PA0230        |
| Alexa Fluor 647     | Mouse   | Life Technologies        | IgG        | 1/1000   |           | A31571        |
